# Supplementary material for: Bioaccumulation and Biomagnification of Polychlorinated Biphenyls and Dichlorodiphenyltrichloroethane in Biota from Qilianyu Island, South China Sea
Source: MDPI journal article supplement (doi:10.3390/toxics10060324), 2022-06-14
Supplement: s1 [file s1]

# Supplementary Materials: Bioaccumulation and Biomagnification of Polychlorinated Biphenyls and Dichlorodiphenyltrichloroethane in Biota from Qilanyu Island, South China Sea

Qingling Wang, Chenmin Xie, Chuyue Long, Weiyan Yang, Yan Wang, Weihai Xu, Li Zhang, and Yuxin Sun

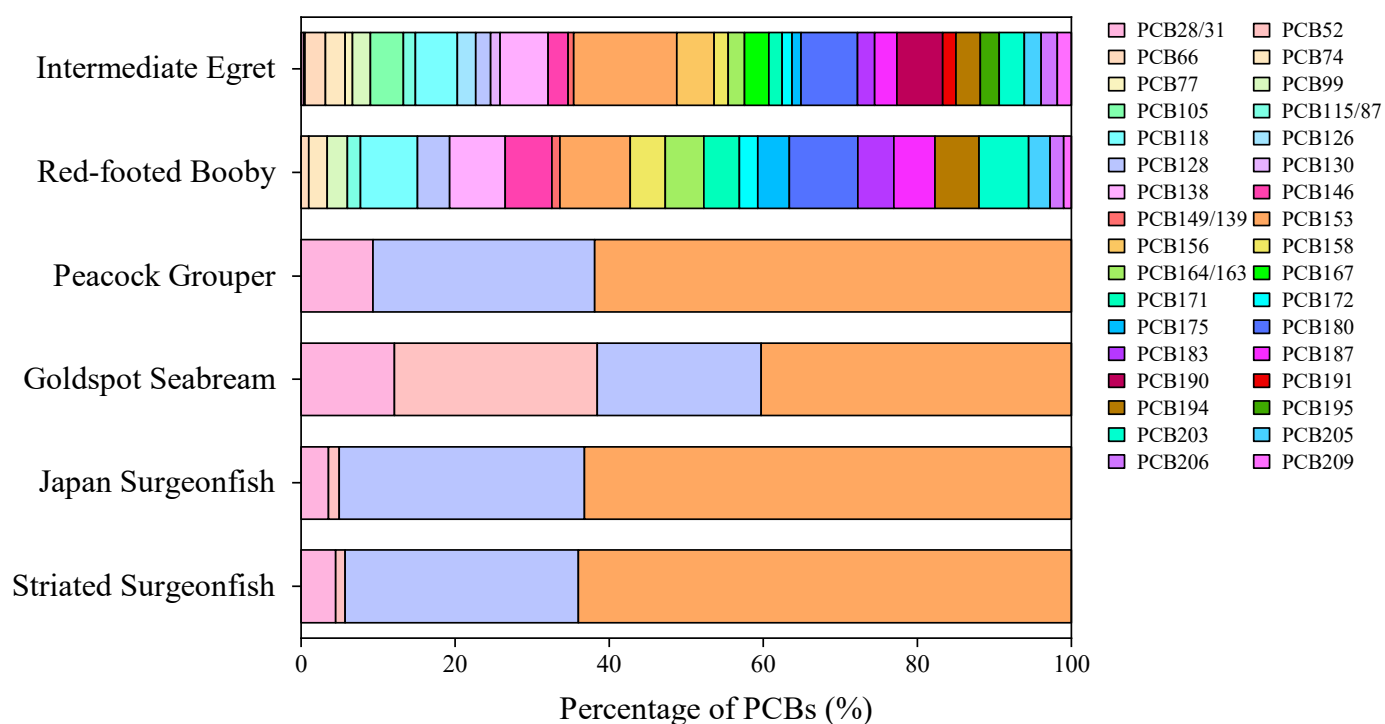

**Figure S1.** PCB congener profiles in biota from Qilanyu Island.

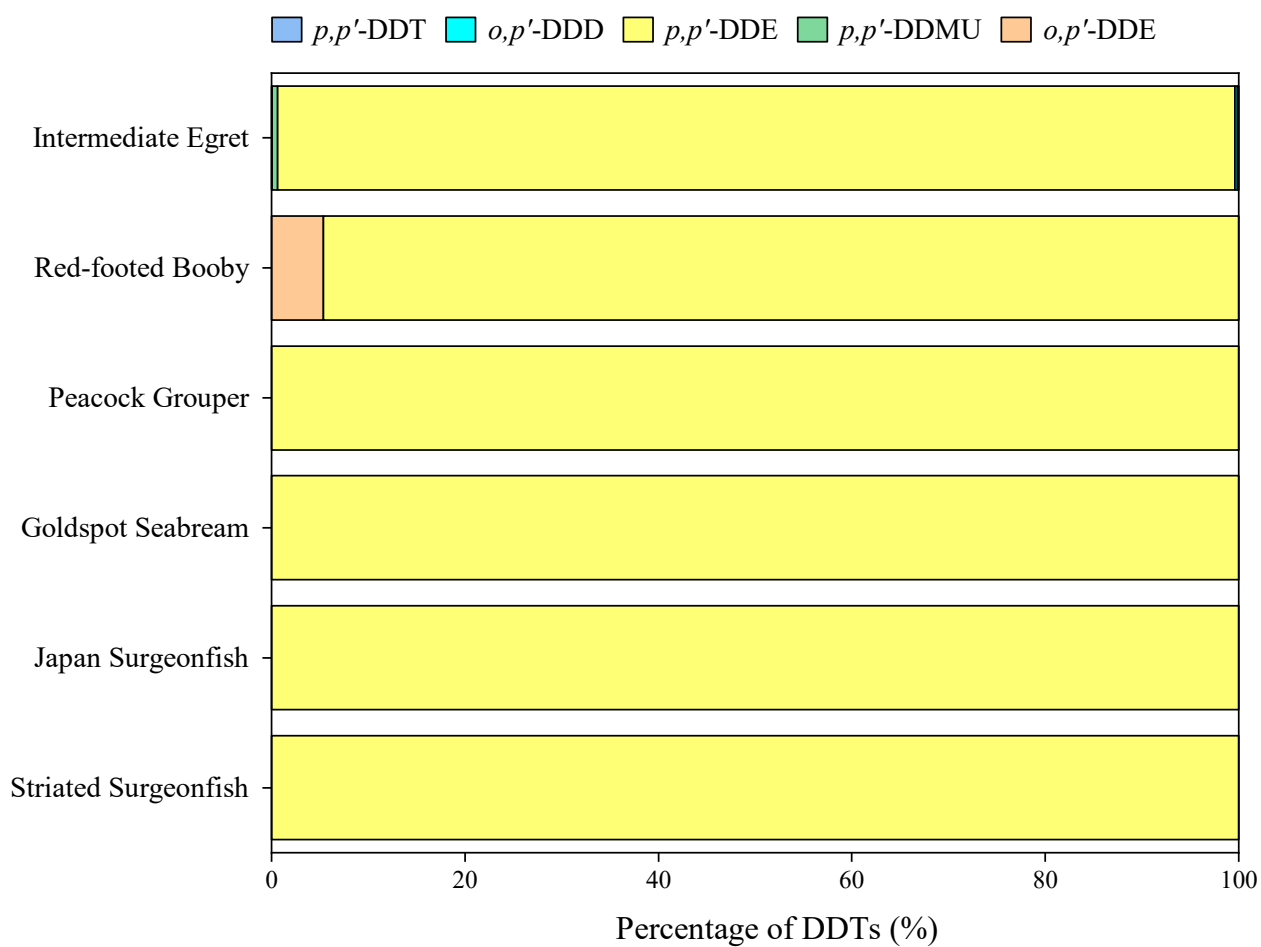

**Figure S2.** Composition profiles of DDTs in biota from Qilianyu Island.

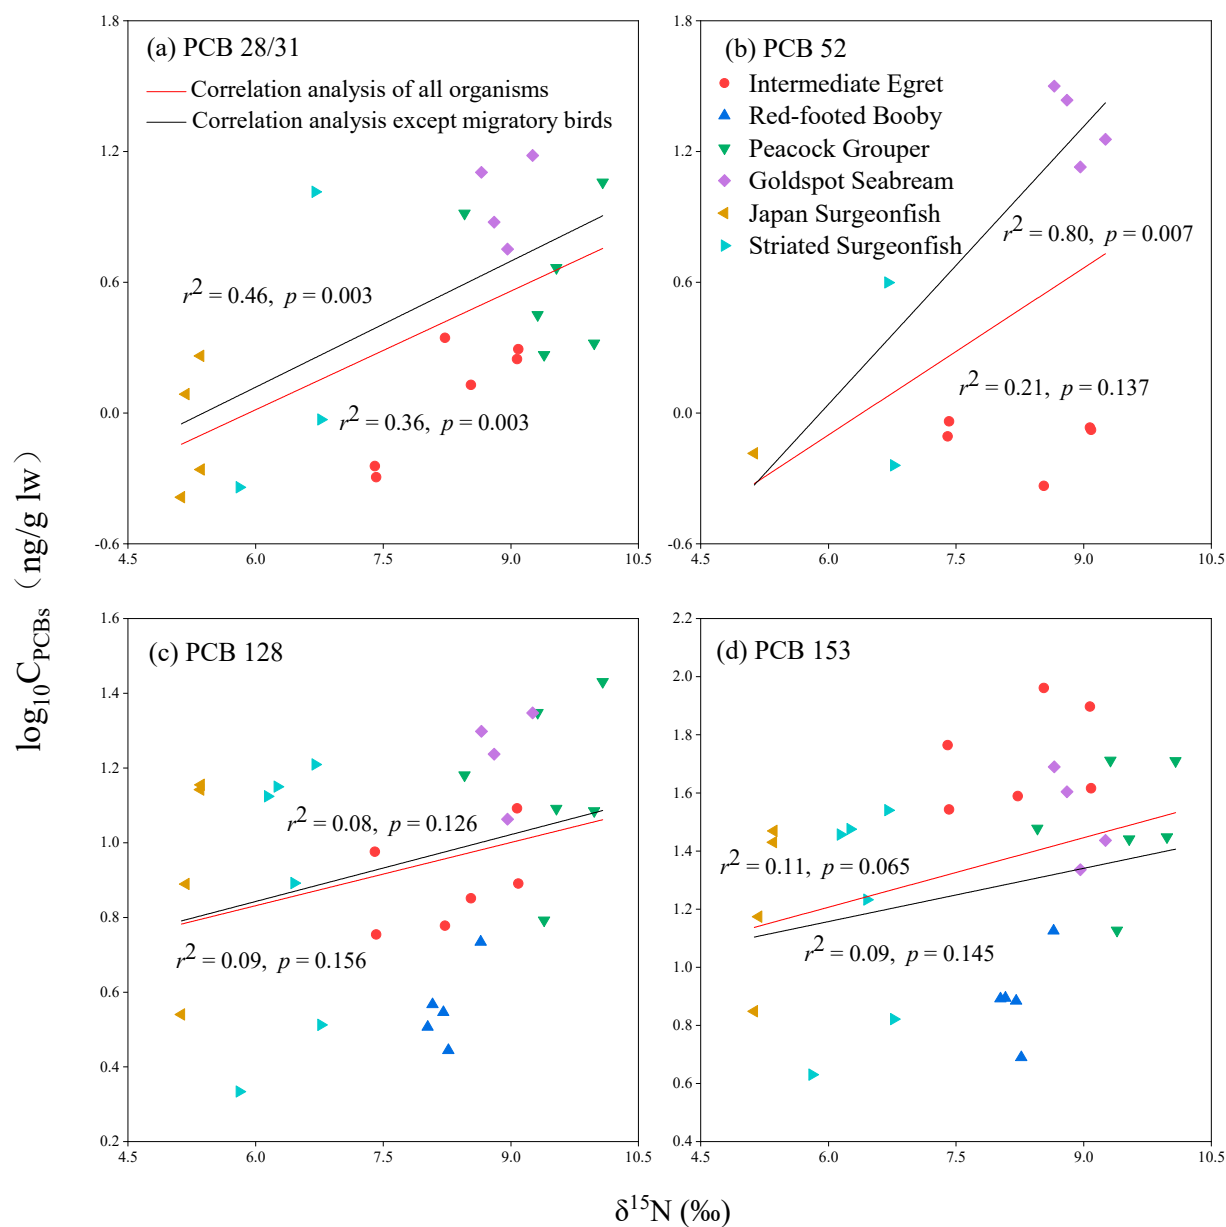

**Figure S3.** Relationships between concentrations of PCB congeners and  $\delta^{15}\text{N}$  in biota species from Qilanyu Island.

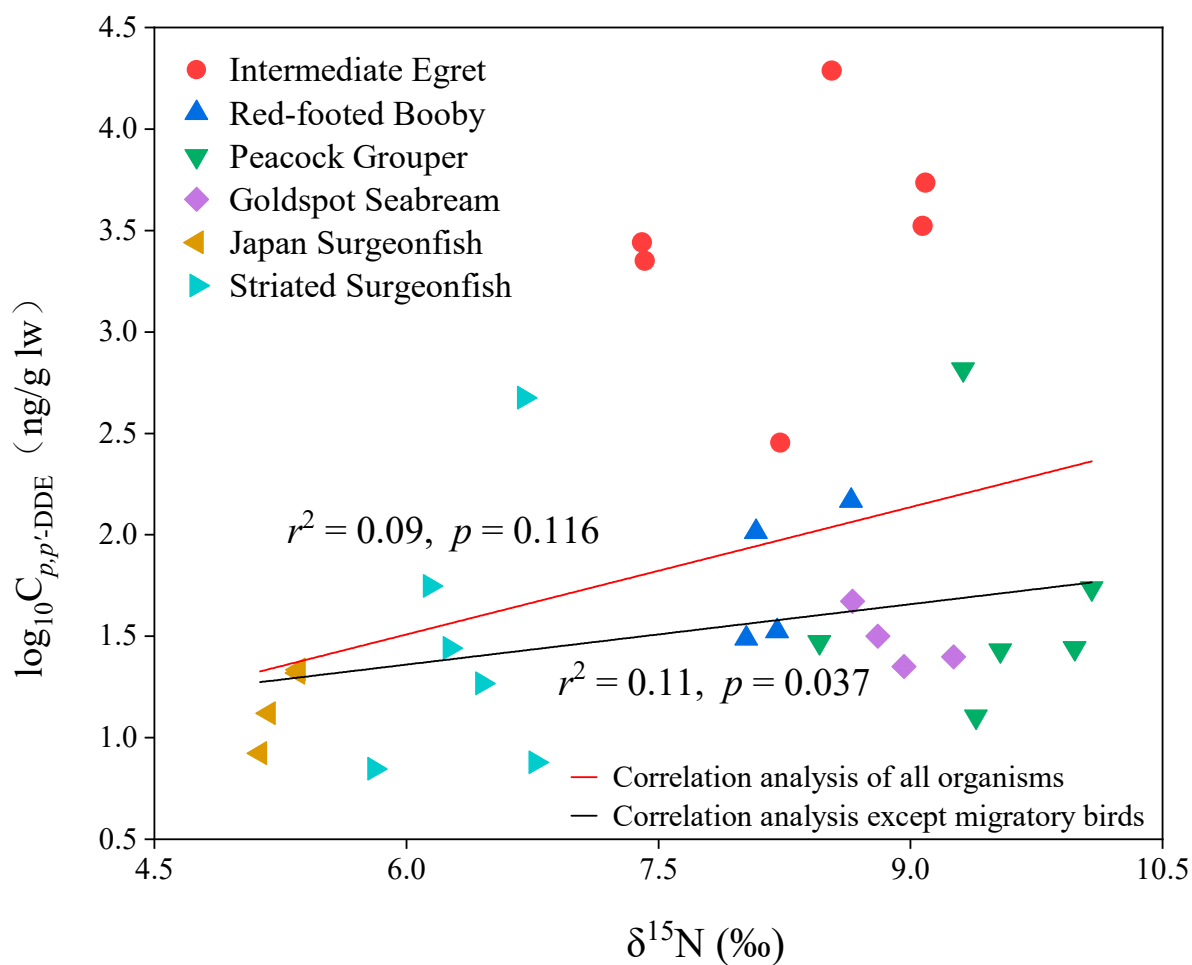

**Figure S4.** Relationships between concentrations of  $p,p'$ -DDE and  $\delta^{15}N$  in biota species from Qilanyu Island.
